# Supplementary material
Source: Springer Nature journal article supplement (https://www.springermedizin.de/resource/supplementary/12883_2014_1018_MOESM1_ESM.pdf/9456648)

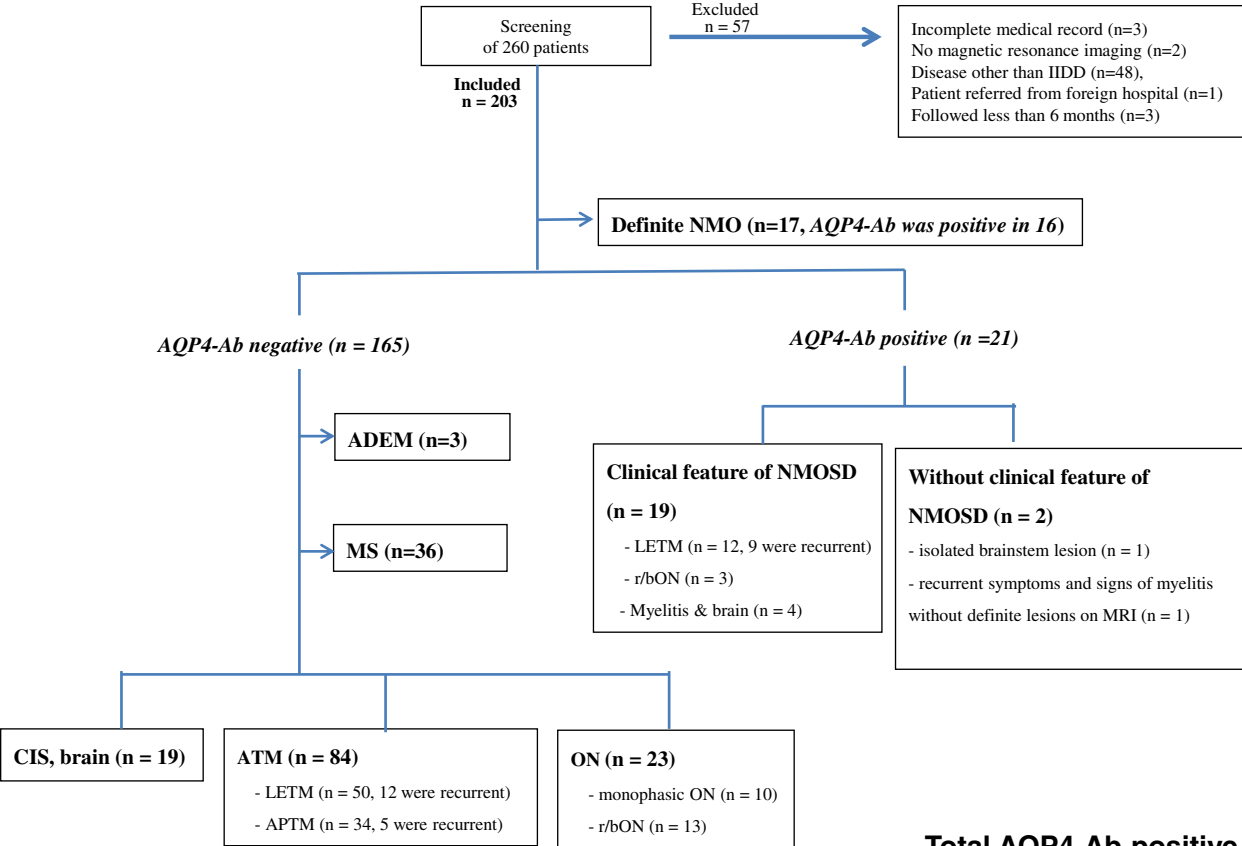

**Total AQP4-Ab positive cases = 37 / 203 (18.2%)**

Supplement: MOESM1 [file 9456648]
